# Supplementary material
Source: publisher site journal article supplement (https://www.dovepress.com/get_supplementary_file.php?f=451301.docx)
Supplement: Supplementary file 1 [file get_supplementary_file.php]

**Supplementary Table 1. Distribution of knowledge dimension**

|  | **Knowledge n（%）** | **Little knowledge n（%）** | **No knowledge n（%）** |
| --- | --- | --- | --- |
| 1. Are you familiar with the concept of robustness? | 45 (9.96) | 152 (33.63) | 255 (56.42) |
| 2. Do you have a grasp of the concept of deep learning? | 119 (26.33) | 268 (59.29) | 65 (14.38) |
| 3. Do you comprehend the practical implementation of deep learning in CT image reconstruction? | 115 (25.44) | 247 (54.65) | 90 (19.91) |
| 4. Are you acquainted with the standard datasets frequently employed in CT image reconstruction, like NBIA, AAPM-Mayo, etc.? | 25 (5.53) | 173 (38.27) | 254 (56.19) |
| 5. Do you comprehend the notion of model generalization in machine learning? | 38 (8.41) | 132 (29.20) | 282 (62.39) |
| 6. Are you aware of the algorithmic bias (discrimination) inherent in AI? | 55 (12.17) | 166 (38.73) | 231 (51.11) |
|  | **Correct n（%）** | **Incorrect n（%）** | **Unclear n（%）** |
| 7. When establishing an artificial intelligence model for aiding image diagnosis, regardless of the model chosen, the verification of robustness is indispensable. | 143 (31.64) | 27 (5.97) | 282 (62.39) |
| 8. Deep learning falls within the realm of machine learning and presently stands as a crucial avenue for realizing artificial intelligence technology. | 305 (67.48) | 4 (0.88) | 143 (31.64) |
| 9. Deep learning finds application in tasks like low-dose CT image denoising, wherein techniques such as deep convolutional neural networks are employed. | 300 (66.37) | 8 (1.77) | 144 (31.86) |
| 10. The performance of a deep learning model remains unaffected by the quality and quantity of the training dataset. | 323 (71.46) | 0 | 129 (28.54) |

**Supplementary Table 2. Distribution of attitude dimension**

| **Item，n (%)** | **Strongly agree**  **/difficult** | **Agree**  **/difficult** | **Neutrality** | **Disagree/not difficult** | **Strongly disagree/not difficult** |
| --- | --- | --- | --- | --- | --- |
| A1. What is your perspective on the necessity of AI-assisted diagnostic systems in the field of medical imaging? | 240 (53.10) | 177 (39.16) | 30 (6.64) | 5 (1.11) | 0 |
| A2. Do you concur that artificial intelligence has a pivotal role in contemporary imaging diagnosis? | 206 (45.58) | 159 (35.18) | 81 (17.92) | 6 (1.33) | 0 |
| A3. Are you of the view that the integration of AI-assisted diagnostic systems into the medical domain is an inevitable future trajectory? | 256 (56.64) | 153 (33.85) | 38 (8.41) | 5 (1.11) | 0 |
| A4. Are you supportive of the implementation of AI-assisted diagnostic systems within our department? | 254 (56.19) | 182 (40.27) | 16 (3.54) | 0 | 0 |
| A5. Do you hold the belief that AI-assisted diagnostic systems can alleviate the workload of physicians and enhance diagnostic efficiency? | 264 (58.41) | 160 (35.40) | 24 (5.31) | 4 (0.88) | 0 |
| A6. Do you anticipate that AI-assisted diagnostic systems will diminish the diagnostic proficiency of radiologists? | 41 (9.07) | 41 (9.07) | 48 (10.62) | 263 (58.19) | 59 (13.05) |
| A7. Do you foresee artificial intelligence eventually supplanting radiologists? | 29 (6.42) | 24 (5.31) | 65 (14.38) | 241 (53.32) | 93 (20.58) |
| A8. To what extent do you place trust in diagnostic outcomes endorsed by artificial intelligence? | 27 (5.97) | 182 (40.27) | 235 (51.99) | 2 (1.77) | 0 |
| A9. Do you agree with the notion that deep learning represents an opaque and inexplicable 'black box'? | 56 (12.39) | 208 (46.02) | 135 (29.87) | 47 (10.40) | 6 (1.33) |
| A10. Are you of the opinion that AI-assisted imaging diagnosis could potentially raise legal and ethical concerns? For instance, determining medical liability in cases where doctors base their diagnoses on AI-assisted results. | 55 (12.17) | 231 (51.11) | 88 (19.47) | 71 (15.71) | 7 (1.55) |
| A11. Given that medical data involves patient privacy, and the formation of medical image datasets could potentially encroach upon patient confidentiality, what are your thoughts on this matter? | 65 (14.38) | 191 (42.26) | 69 (15.27) | 116 (25.66) | 11 (2.43) |
| A12. In your assessment, do the overall benefits of incorporating artificial intelligence into imaging diagnostics outweigh its drawbacks? | 145 (32.08) | 262 (57.96) | 39 (8.63) | 6 (1.33) | 0 |
| A13. Recognizing AI-assisted diagnosis as a rapidly evolving field at the intersection of medicine and engineering, do you find it challenging to continually keep up with the evolving knowledge? | 15 (3.32) | 71 (15.71) | 231 (51.11) | 116 (25.66) | 19 (4.20) |

**Supplementary Table 3 SEM model fits**

| Indicators | Reference | Actual |
| --- | --- | --- |
| CMIN/DF | 1-3: Excellent, 3-5: Good | 3.216 |
| RMSEA | <0.08: Good | 0.070 |
| IFI | >0.8: Good | 0.860 |
| TLI | >0.8: Good | 0.836 |
| CFI | >0.8: Good | 0.858 |
| GFI | >0.8: Good | 0.860 |
